# Supplementary material for: Multi-compartmental modeling of SORLA’s influence on amyloidogenic processing in Alzheimer’s disease
Source: Springer Nature journal article supplement (doi:10.1186/1752-0509-6-74), 2012-06-22
Supplement: 12918_2012_947_MOESM1_ESM.pdf [file 12918_2012_947_MOESM1_ESM.pdf]

## ADDITIONAL FILE

# Multi-compartmental modeling of SORLA's influence on amyloidogenic processing in Alzheimers disease

Angelyn Lao,<sup>\*</sup> Vanessa Schmidt,<sup>†</sup> Yvonne Schmitz,<sup>\*</sup> Thomas Willnow,<sup>†</sup>  
and Olaf Wolkenhauer<sup>\*‡</sup>

## Contents

|          |                                                  |           |
|----------|--------------------------------------------------|-----------|
| <b>1</b> | <b>Mathematical Modeling</b>                     | <b>2</b>  |
| 1.1      | Kinetic reactions . . . . .                      | 2         |
| 1.2      | Ordinary differential equations (ODEs) . . . . . | 2         |
| 1.3      | Assumptions . . . . .                            | 4         |
| 1.3.1    | Quasi-steady state . . . . .                     | 4         |
| 1.3.2    | Rapid-Equilibrium . . . . .                      | 4         |
| 1.3.3    | Quasi-equilibrium . . . . .                      | 4         |
| 1.3.4    | Ratio of association constant . . . . .          | 5         |
| 1.3.5    | Law of conservation . . . . .                    | 6         |
| 1.4      | End products . . . . .                           | 10        |
| <b>2</b> | <b>List of Additional Tables</b>                 | <b>11</b> |
|          | Table S1 . . . . .                               | 11        |
|          | Table S2 . . . . .                               | 12        |
|          | Table S3 . . . . .                               | 14        |
|          | Table S4 . . . . .                               | 15        |
| <b>3</b> | <b>List of Additional Figures</b>                | <b>16</b> |
|          | Figure S1 . . . . .                              | 16        |

---

<sup>\*</sup>Department of Systems Biology and Bioinformatics, Institute of Computer Science, University of Rostock, 18051 Rostock, Germany

<sup>†</sup>Max-Delbrück-Center for Molecular Medicine, 13125 Berlin

<sup>‡</sup>Stellenbosch Institute for Advanced Study (STIAS), Stellenbosch 7600, South Africa

# 1 Mathematical Modeling

## 1.1 Kinetic reactions

TGN

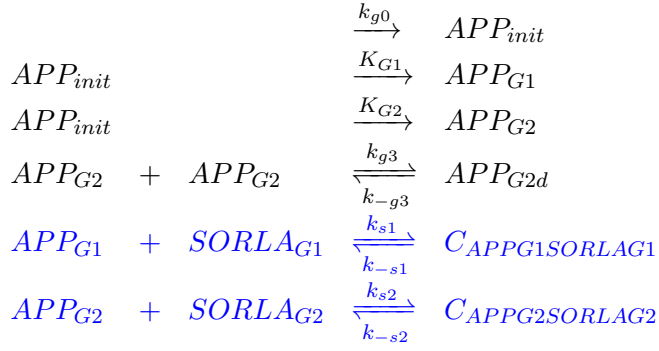

cell surface

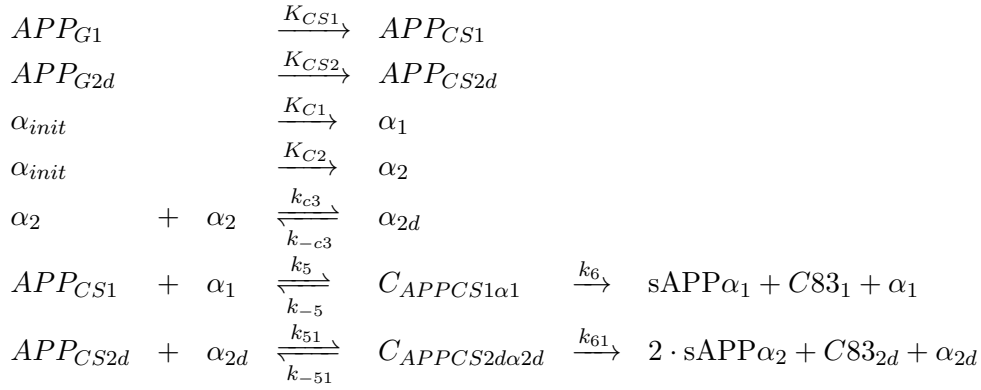

endosome

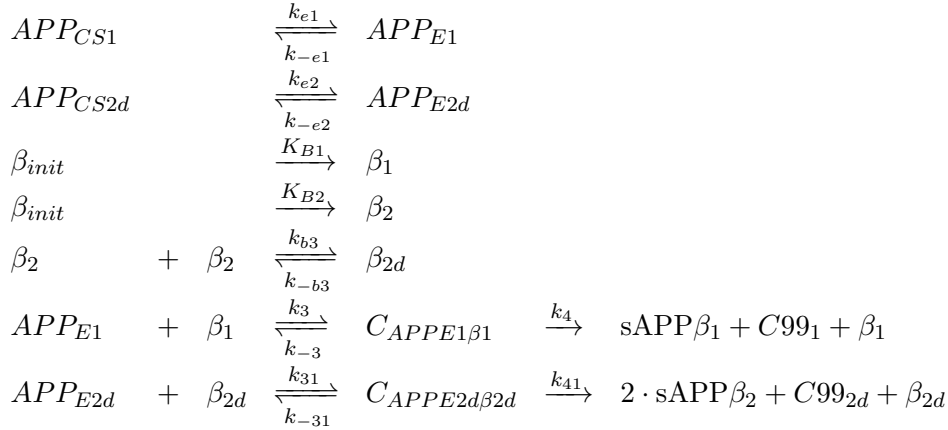

## 1.2 Ordinary differential equations (ODEs)

APP

$$\begin{aligned}
\dot{APP}_{init} &= k_{g0} - (k_{g1} + k_{g2}) \cdot APP_{init} + k_{-g1} \cdot APP_{G1} + k_{-g2} \cdot APP_{G2} \\
\dot{APP}_{G1} &= k_{g1} \cdot APP_{init} - (k_{-g1} + k_{cs1}) \cdot APP_{G1} + k_{-cs1} \cdot APP_{CS1} - \\
&\quad k_{s1} \cdot APP_{G1} \cdot \text{SORLAG}_1 + k_{-s1} \cdot C_{APPG1\text{SORLAG}_1} \\
\dot{APP}_{G2} &= k_{g2} \cdot APP_{init} - k_{-g2} \cdot APP_{G2} + 2 \cdot (k_{-g3} \cdot APP_{G2d} - k_{g3} \cdot APP_{G2}^2) - \\
&\quad k_{s2} \cdot APP_{G2} \cdot \text{SORLAG}_2 + k_{-s2} \cdot C_{APPG2\text{SORLAG}_2} \\
\dot{APP}_{G2d} &= 2 \cdot (k_{g3} \cdot APP_{G2}^2 - k_{-g3} \cdot APP_{G2d}) - k_{cs2} \cdot APP_{G2d} + k_{-cs2} \cdot APP_{CS2d} \\
\dot{APP}_{CS1} &= k_{cs1} \cdot APP_{G1} - (k_{-cs1} + k_{e1}) \cdot APP_{CS1} + k_{-e1} \cdot APP_{E1} - \\
&\quad k_5 \cdot APP_{CS1} \cdot \alpha_1 + k_{-5} \cdot C_{APPCS1\alpha_1} \\
\dot{APP}_{CS2d} &= k_{cs2} \cdot APP_{G2d} - (k_{-cs2} + k_{e2}) \cdot APP_{CS2d} + k_{-e2} \cdot APP_{E2d} - \\
&\quad k_{51} \cdot APP_{CS2d} \cdot \alpha_{2d} + k_{-51} \cdot C_{APPCS2d\alpha_{2d}} \\
\dot{APP}_{E1} &= k_{e1} \cdot APP_{CS1} - k_{-e1} \cdot APP_{E1} - k_3 \cdot APP_{E1} \cdot \beta_1 + k_{-3} \cdot C_{APPE1\beta_1} \\
\dot{APP}_{E2d} &= k_{e2} \cdot APP_{CS2d} - k_{-e2} \cdot APP_{E2d} - k_{31} \cdot APP_{E2d} \cdot \beta_{2d} + k_{-31} \cdot C_{APPE2d\beta_{2d}}
\end{aligned}$$

### influence of SORLA

$$\begin{aligned}
\dot{C}_{APPG1\text{SORLAG}_1} &= k_{s1} \cdot APP_{G1} \cdot \text{SORLAG}_1 - k_{-s1} \cdot C_{APPG1\text{SORLAG}_1} \\
\dot{C}_{APPG2\text{SORLAG}_2} &= k_{s2} \cdot APP_{G2} \cdot \text{SORLAG}_2 - k_{-s2} \cdot C_{APPG2\text{SORLAG}_2} \\
\dot{\text{SORLAG}}_1 &= -C_{APPG1\text{SORLAG}_1} \\
\dot{\text{SORLAG}}_2 &= -C_{APPG2\text{SORLAG}_2}
\end{aligned}$$

### complex formations of APP and secretases

$$\begin{aligned}
\dot{C}_{APPCS1\alpha_1} &= k_5 \cdot APP_{CS1} \cdot \alpha_1 - (k_{-5} + k_6) \cdot C_{APPCS1\alpha_1} \\
\dot{C}_{APPCS2d\alpha_{2d}} &= k_{51} \cdot APP_{CS2d} \cdot \alpha_{2d} - (k_{-51} + k_{61}) \cdot C_{APPCS2d\alpha_{2d}} \\
\dot{C}_{APPE1\beta_1} &= k_3 \cdot APP_{E1} \cdot \beta_1 - (k_{-3} + k_4) \cdot C_{APPE1\beta_1} \\
\dot{C}_{APPE2d\beta_{2d}} &= k_{31} \cdot APP_{E2d} \cdot \beta_{2d} - (k_{-31} + k_{41}) \cdot C_{APPE2d\beta_{2d}}
\end{aligned}$$

### secretases

$$\begin{aligned}
\dot{\alpha}_{init} &= k_{-c1} \cdot \alpha_1 + k_{-c2} \cdot \alpha_2 - (k_{c1} + k_{c2}) \cdot \alpha_{init} \\
\dot{\alpha}_1 &= k_{c1} \cdot \alpha_{init} - k_{-c1} \cdot \alpha_1 - C_{APPCS1\alpha_1} \\
\dot{\alpha}_2 &= k_{c2} \cdot \alpha_{init} - k_{-c2} \cdot \alpha_2 - 2 \cdot (k_{c3} \cdot \alpha_2^2 - k_{-c3} \cdot \alpha_{2d}) \\
\dot{\alpha}_{2d} &= 2 \cdot (k_{c3} \cdot \alpha_2^2 - k_{-c3} \cdot \alpha_{2d}) - C_{APPCS2d\alpha_{2d}} \\
\dot{\beta}_{init} &= k_{-b1} \cdot \beta_1 + k_{-b2} \cdot \beta_2 - (k_{b1} + k_{b2}) \cdot \beta_{init} \\
\dot{\beta}_1 &= k_{b1} \cdot \beta_{init} - k_{-b1} \cdot \beta_1 - C_{APPE1\beta_1} \\
\dot{\beta}_2 &= k_{b2} \cdot \beta_{init} - k_{-b2} \cdot \beta_2 - 2 \cdot (k_{b3} \cdot \beta_2^2 - k_{-b3} \cdot \beta_{2d}) \\
\dot{\beta}_{2d} &= 2 \cdot (k_{b3} \cdot \beta_2^2 - k_{-b3} \cdot \beta_{2d}) - C_{APPE2d\beta_{2d}}
\end{aligned}$$

### products

$$\begin{aligned}
s\dot{A}PP_{\alpha_1} &= k_6 \cdot C_{APPCS1\alpha_1} \\
C\dot{S}3_1 &= k_6 \cdot C_{APPCS1\alpha_1} \\
s\dot{A}PP_{\alpha_2} &= 2 \cdot k_{61} \cdot C_{APPCS2d\alpha_2d} \\
C\dot{S}3_{2d} &= k_{61} \cdot C_{APPCS2d\alpha_2d} \\
s\dot{A}PP_{\beta_1} &= k_4 \cdot C_{APPE1\beta_1} \\
C\dot{9}9_1 &= k_4 \cdot C_{APPE1\beta_1} \\
s\dot{A}PP_{\beta_2} &= 2 \cdot k_{41} \cdot C_{APPE2d\beta_2d} \\
C\dot{9}9_{2d} &= k_{41} \cdot C_{APPE2d\beta_2d}
\end{aligned}$$

### 1.3 Assumptions

#### 1.3.1 Quasi-steady state

When quasi-steady state is assumed to a complex, e.g.  $C_{APPCS1\alpha_1}$ , without loss of generality  $C_{APPCS1\alpha_1} = 0$ . We will show computational details for this example and the others will follow similarly.

$$\begin{aligned}
C_{APPCS1\alpha_1} &= k_5 \cdot APP_{CS1} \cdot \alpha_1 - (k_{-5} + k_6) \cdot C_{APPCS1\alpha_1} \\
0 &= k_5 \cdot APP_{CS1} \cdot \alpha_1 - (k_{-5} + k_6) \cdot C_{APPCS1\alpha_1} \\
C_{APPCS1\alpha_1} &= \frac{k_5 \cdot \alpha_1 \cdot APP_{CS1}}{k_{-5} + k_6}
\end{aligned}$$

Therefore,

$$\begin{aligned}
C_{APPCS1\alpha_1} &= \frac{\alpha_1 \cdot APP_{CS1}}{K_{M\alpha_1}} \quad , \quad K_{M\alpha_1} = \frac{k_{-5} + k_6}{k_5} \\
C_{APPE1\beta_1} &= \frac{\beta_1 \cdot APP_{E1}}{K_{M\beta_1}} \quad , \quad K_{M\beta_1} = \frac{k_{-3} + k_4}{k_3} \\
C_{APPCS2d\alpha_2d} &= \frac{\alpha_{2d} \cdot APP_{CS2d}}{K_{M\alpha_2d}} \quad , \quad K_{M\alpha_2d} = \frac{k_{-51} + k_{61}}{k_{51}} \\
C_{APPE2d\beta_2d} &= \frac{\beta_{2d} \cdot APP_{E2d}}{K_{M\beta_2d}} \quad , \quad K_{M\beta_2d} = \frac{k_{-31} + k_{41}}{k_{31}}
\end{aligned}$$

#### 1.3.2 Rapid-Equilibrium

Without loss of generality, rapid-equilibrium is assumed to  $C_{APPG1SORLAG1}$  and  $C_{APPG2SORLAG2}$  such that  $C_{APPG1SORLAG1} = 0$  and  $C_{APPG2SORLAG2} = 0$ . The assumption gives rise to,

$$\begin{aligned}
C_{APPG1SORLAG1} &= K_{S1} \cdot SORLAG_1 \cdot APP_{G1} \quad , \quad \text{where } K_{S1} = \frac{k_{s1}}{k_{-s1}} \text{, and} \\
C_{APPG2SORLAG2} &= K_{S2} \cdot SORLAG_2 \cdot APP_{G2} \quad , \quad \text{where } K_{S2} = \frac{k_{s2}}{k_{-s2}}.
\end{aligned}$$

#### 1.3.3 Quasi-equilibrium

Recall the biochemical networks of the transportation of reactants shown in previous section,

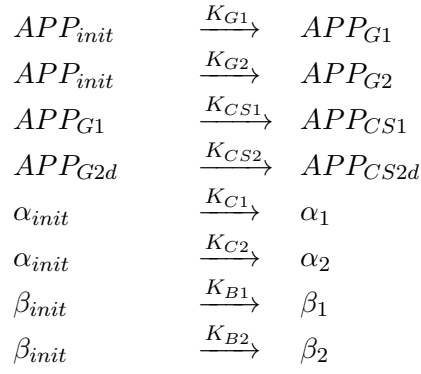

The second reactant is assumed to be in quasi-equilibrium with the first reactant. Without loss of generality, the concentration of the second reactant is related to the first reactant by an ordinary equilibrium expression, such as

$$\begin{aligned}
APP_{G1} &= K_{G1} \cdot APP_{init}, \text{ where } K_{G1} = \frac{k_{g1}}{k_{-g1}}, \\
APP_{G2} &= K_{G2} \cdot APP_{init}, \text{ where } K_{G2} = \frac{k_{g2}}{k_{-g2}}, \\
APP_{CS1} &= K_{CS1} \cdot APP_{G1}, \text{ where } K_{CS1} = \frac{k_{cs1}}{k_{-cs1}}, \\
APP_{CS2d} &= K_{CS2} \cdot APP_{G2d}, \text{ where } K_{CS2} = \frac{k_{cs2}}{k_{-cs2}}, \\
\alpha_1 &= K_{C1} \cdot \alpha_{init}, \text{ where } K_{C1} = \frac{k_{c1}}{k_{-c1}}, \\
\alpha_2 &= K_{C2} \cdot \alpha_{init}, \text{ where } K_{C2} = \frac{k_{c2}}{k_{-c2}}, \\
\beta_1 &= K_{B1} \cdot \beta_{init}, \text{ where } K_{B1} = \frac{k_{b1}}{k_{-b1}}, \\
\beta_2 &= K_{B2} \cdot \beta_{init}, \text{ where } K_{B2} = \frac{k_{b2}}{k_{-b2}},
\end{aligned}$$

### 1.3.4 Ratio of association constant

Recall the biochemical networks of the transportation of reactants shown in previous section,

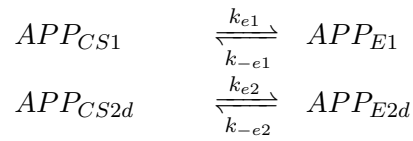

and also the dimerization of reactants,

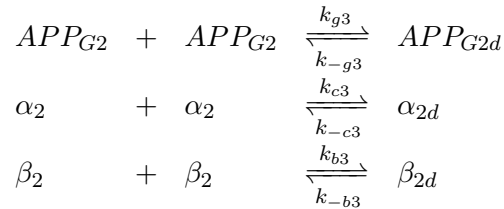

We take one example and compute for its ratio of association constant:

$$K_{E1} = \frac{k_{e1}}{k_{-e1}} = \frac{APP_{E1}}{APP_{CS1}}$$

such that

$$APP_{E1} = K_{E1} \cdot APP_{CS1}, \text{ where } K_{E1} = \frac{k_{e1}}{k_{-e1}}.$$

The others follow similar approach of computation and are denoted as follows:

$$APP_{E2d} = K_{E2} \cdot APP_{CS2d}, \text{ where } K_{E2} = \frac{k_{e2}}{k_{-e2}},$$

$$APP_{G2d} = K_{G3} \cdot APP_{G2}^2, \text{ where } K_{G3} = \frac{k_{g3}}{k_{-g3}},$$

$$\alpha_{2d} = K_{C3} \cdot \alpha_2^2, \text{ where } K_{C3} = \frac{k_{c3}}{k_{-c3}},$$

$$\beta_{2d} = K_{B3} \cdot \beta_2^2, \text{ where } K_{B3} = \frac{k_{b3}}{k_{-b3}},$$

### 1.3.5 Law of conservation

Law of conservation is assumed to APP,  $\alpha$ -secretase,  $\beta$ -secretase, and SORLA. Regardless of SORLA, the total amounts of APP,  $\alpha$ -secretase,  $\beta$ -secretase, and SORLA, that are conserved in the system, are represented by the following equations:

$$\alpha_{Tot} = \alpha_{init} + \alpha_{monomer} + \alpha_{dimer} \quad (1)$$

$$\beta_{Tot} = \beta_{init} + \beta_{monomer} + \beta_{dimer} \quad (2)$$

$$APP_{Tot} = APP_{init} + APP_{monomer} + APP_{dimer} \quad (3)$$

$$SORLA_{Tot} = SORLA_{monomer} + SORLA_{dimer} \quad (4)$$

In order to differentiate the functions in the presence and in the absence of SORLA, the reactants and complexes are denoted as functions with respect to the reactants they depend on in the process of computation. For example,  $f(x_1, y_1)$  is the function  $f$  that is dependent on the representation of  $x_1$  and  $y_1$ .

**In the absence of SORLA,**

$$\begin{aligned} \alpha_{monomer} &= \alpha_1(\alpha_{init}) + C_{APP_{CS1}\alpha_1}(APP_{init}, \alpha_{init}) \\ \alpha_{dimer} &= \alpha_2(\alpha_{init}) + 2 \cdot [\alpha_{2d}(\alpha_{init}) + C_{APP_{CS2d}\alpha_2d}(APP_{init}, \alpha_{init})] \\ \beta_{monomer} &= \beta_1(\beta_{init}) + C_{APPE1\beta_1}(APP_{init}, \beta_{init}) \\ \beta_{dimer} &= \beta_2(\beta_{init}) + 2 \cdot [\beta_{2d}(\beta_{init}) + C_{APPE2d\beta_2d}(APP_{init}, \beta_{init})] \\ APP_{monomer} &= APP_{G1}(APP_{init}) + APP_{CS1}(APP_{init}) + APP_{E1}(APP_{init}) + \\ &\quad C_{APP_{CS1}\alpha_1}(APP_{init}, \alpha_{init}) + C_{APPE1\beta_1}(APP_{init}, \beta_{init}) \\ APP_{dimer} &= APP_{G2}(APP_{init}) + 2 \cdot [APP_{G2d}(APP_{init}) + APP_{CS2d}(APP_{init}) + APP_{E2d}(APP_{init}) + \\ &\quad C_{APP_{CS2d}\alpha_2d}(APP_{init}, \alpha_{init}) + C_{APPE2d\beta_2d}(APP_{init}, \beta_{init})] \end{aligned} \quad (5)$$

The equations above are substituted into Equations (1), (2), and (3),  $APP_{init}$ ,  $\alpha_{init}$  and  $\beta_{init}$  are solved with respect to  $APP_{Tot}$ ,  $\alpha_{Tot}$  and  $\beta_{Tot}$ .

For  $APP_{Tot}$  without SORLA,

$$\begin{aligned}
APP_{Tot} = & APP_{init} + \\
& K_{G1} \cdot APP_{init} \cdot \left\{ 1 + K_{CS1} \cdot \left[ 1 + \frac{K_{C1} \cdot \alpha_{init}}{K_{M\alpha1}} \right] + K_{E1} \cdot K_{CS1} \cdot \left[ 1 + \frac{K_{B1} \cdot \beta_{init}}{K_{M\beta1}} \right] \right\} + \\
& K_{G2} \cdot APP_{init} + 2 \cdot K_{G3} \cdot (K_{G2} \cdot APP_{init})^2 \cdot \left\{ 1 + K_{CS2} \cdot \left[ 1 + \frac{K_{C3} \cdot (K_{C2} \cdot \alpha_{init})^2}{K_{M\alpha2d}} \right] + \right. \\
& \left. K_{E2} \cdot K_{CS2} \cdot \left[ 1 + \frac{K_{B3} \cdot (K_{B2} \cdot \beta_{init})^2}{K_{M\beta2d}} \right] \right\} \quad (6)
\end{aligned}$$

Due to the complexity of Equation (6), the computation of  $APP_{init}$  with respect to  $APP_{Tot}$  will not be shown algebraically, but it will be solved using `fzero()` function that is available in MATLAB. Nevertheless, the algebraic computation for  $\alpha_{init}$  and  $\beta_{init}$  are shown below. We will show the computation for  $\alpha_{init}$  and the solution for  $\beta_{init}$  will follow similarly. Take  $\alpha_{Tot}$  shown in Equation (1), i.e.

$$\alpha_{Tot} = \alpha_{init} + \alpha_{monomer} + \alpha_{dimer}$$

$\alpha_{monomer}$  and  $\alpha_{dimer}$  from Equation (5) are substituted into Equation (1), which leads to

$$\begin{aligned}
\alpha_{Tot} = & \alpha_{init} + [\alpha_1(\alpha_{init}) + C_{APPCS1\alpha1}(APP_{init}, \alpha_{init})] + \\
& \{\alpha_2(\alpha_{init}) + 2 \cdot [\alpha_{2d}(\alpha_{init}) + C_{APPCS2d\alpha2d}(APP_{init}, \alpha_{init})]\}
\end{aligned}$$

Further substitutions of the notations that are derived in the previous sections give

$$\begin{aligned}
\alpha_{Tot} = & \alpha_{init} + K_{C1} \cdot \alpha_{init} \cdot \left( 1 + \frac{APP_{CS1}}{K_{M\alpha1}} \right) + K_{C2} \cdot \alpha_{init} + 2 \cdot K_{C3} \cdot (K_{C2} \cdot \alpha_{init})^2 \cdot \left( 1 + \frac{APP_{CS2d}}{K_{M\alpha2d}} \right) \\
= & \alpha_{init} + K_{C1} \cdot \alpha_{init} \cdot \left( 1 + \frac{K_{CS1} \cdot K_{G1} \cdot APP_{init}}{K_{M\alpha1}} \right) + K_{C2} \cdot \alpha_{init} + \\
& 2 \cdot K_{C3} \cdot (K_{C2} \cdot \alpha_{init})^2 \cdot \left( 1 + \frac{K_{CS2} \cdot K_{G3} \cdot (K_{G2} \cdot APP_{init})^2}{K_{M\alpha2d}} \right) \quad (7)
\end{aligned}$$

such that

$$\alpha_{init} = \frac{-B_\alpha \pm \sqrt{B_\alpha^2 - 4 \cdot A_\alpha \cdot C_\alpha}}{2 \cdot A_\alpha} \quad (8)$$

where

$$\begin{aligned}
A_\alpha &= 2 \cdot K_{C3} \cdot K_{C2}^2 \cdot \left( 1 + \frac{K_{CS2} \cdot K_{G3} \cdot (K_{G2} \cdot APP_{init})^2}{K_{M\alpha2d}} \right) \\
B_\alpha &= 1 + K_{C1} \cdot \left( 1 + \frac{K_{CS1} \cdot K_{G1} \cdot APP_{init}}{K_{M\alpha1}} \right) + K_{C2} \\
C_\alpha &= -\alpha_{Tot}.
\end{aligned}$$

Similarly for  $\beta_{Tot}$  shown in Equation (1):

$$\beta_{init} = \frac{-B_\beta \pm \sqrt{B_\beta^2 - 4 \cdot A_\beta \cdot C_\beta}}{2 \cdot A_\beta} \quad (9)$$

where

$$\begin{aligned}
A_\beta &= 2 \cdot K_{B3} \cdot K_{B2}^2 \cdot \left( 1 + \frac{K_{E2} \cdot K_{CS2} \cdot K_{G3} \cdot (K_{G2} \cdot APP_{init})^2}{K_{M\beta2d}} \right) \\
B_\beta &= 1 + K_{B1} \cdot \left( 1 + \frac{K_{E1} \cdot K_{CS1} \cdot K_{G1} \cdot APP_{init}}{K_{M\beta1}} \right) + K_{B2} \\
C_\beta &= -\beta_{Tot}.
\end{aligned}$$

Note that only the positive solutions are biologically meaningful.

**In the presence of SORLA**, one of the main objective of our study is to differentiate the influence of SORLA in monomer and in dimer processing. Hence, it is necessary to further assume law of conservation in each processing. Otherwise, the SORLA assigned in each processing will indirectly affect the other processing (which can easily be shown by simple algebraic equations).

Here, we consider SORLA to be directly influencing the amounts of free *APP* available in monomer and dimer processing without affecting  $APP_{init}$ . Again, it is important to emphasize that the reason behind this is because of the objective we set at the beginning of the study. Thus, in the presence of SORLA, the effect of SORLA into the free *APP* starts with  $APP_{G1}$  for monomer processing and  $APP_{G2}$  for dimer processing. Henceforth, the equations shown in Equation (5) are rewritten in the following ways:

$$\begin{aligned}
\alpha_{monomer} &= \alpha_1 + C_{APPCS1\alpha1}(APP_{G1}, \alpha_1) \\
\alpha_{dimer} &= \alpha_2 + 2 \cdot (\alpha_{2d}(\alpha_2) + C_{APPCS2d\alpha2d}(APP_{G2}, \alpha_2)) \\
\beta_{monomer} &= \beta_1 + C_{APPE1\beta1}(APP_{G1}, \beta_1) \\
\beta_{dimer} &= \beta_2 + 2 \cdot [\beta_{2d}(\beta_2) + C_{APPE2d\beta2d}(APP_{G2}, \beta_2)] \\
APP_{monomer} &= APP_{G1} + APP_{CS1}(APP_{G1}) + APP_{E1}(APP_{G1}) + \\
&\quad C_{APPCS1\alpha1}(APP_{G1}, \alpha_1) + C_{APPE1\beta1}(APP_{G1}, \beta_1) + \\
&\quad C_{APPG1SORLAG1}(APP_{G1}, SORLAG1) \\
APP_{dimer} &= APP_{G2} + 2 \cdot [APP_{G2d}(APP_{G2}) + APP_{CS2d}(APP_{G2}) + APP_{E2d}(APP_{G2}) + \\
&\quad C_{APPCS2d\alpha2d}(APP_{G2}, \alpha_2) + C_{APPE2d\beta2d}(APP_{G2}, \beta_2)] + \\
&\quad C_{APPG2SORLAG2}(APP_{G2}, SORLAG2) \\
SORLA_{monomer} &= SORLAG1 + C_{APPG1SORLAG1}(APP_{G1}, SORLAG1) \\
SORLA_{dimer} &= SORLAG2 + C_{APPG2SORLAG2}(APP_{G2}, SORLAG2)
\end{aligned} \tag{10}$$

Similarly, the equations above are substituted to Equations (1), (2), and (3).  $APP_{G1}$ ,  $\alpha_1$  and  $\beta_1$  are solved with respect to the total amount of  $APP_{monomer}$ ,  $\alpha_{monomer}$  and  $\beta_{monomer}$  concentrations calculated from the case without SORLA. Likewise,  $APP_{G2}$ ,  $\alpha_2$  and  $\beta_2$  are solved with respect to the total amount of  $APP_{dimer}$ ,  $\alpha_{dimer}$  and  $\beta_{dimer}$  concentrations derived from the case without SORLA.

Moreover,

$$\begin{aligned}
SORLA_{monomer} &= SORLAG1 + C_{APPG1SORLAG1}(APP_{G1}, SORLAG1) \\
&= SORLAG1 \cdot (1 + K_{S1} \cdot APP_{G1})
\end{aligned}$$

implies that

$$SORLAG1 = SORLA_{monomer} \cdot (1 + K_{S1} \cdot APP_{G1})^{-1}$$

and thus

$$C_{APPG1SORLAG1} = K_{S1} \cdot APP_{G1} \cdot [SORLA_{monomer} \cdot (1 + K_{S1} \cdot APP_{G1})^{-1}]$$

Similarly,

$$C_{APPG2SORLAG2} = K_{S2} \cdot APP_{G2} \cdot [SORLA_{dimer} \cdot (1 + K_{S2} \cdot APP_{G2})^{-1}]$$



For  $APP_{Tot}$  with SORLA,

$$\begin{aligned}
APP_{Tot} = & APP_{init} + \\
& APP_{G1} \cdot \left\{ 1 + K_{CS1} \cdot \left[ 1 + \frac{\alpha_1}{K_{M\alpha 1}} \right] + K_{E1} \cdot K_{CS1} \cdot \left[ 1 + \frac{\beta_1}{K_{M\beta 1}} \right] \right\} + \\
& K_{S1} \cdot APP_{G1} \cdot \left[ \frac{SORLA_{monomer}}{1 + K_{S1} \cdot APP_{G1}} \right] + K_{S2} \cdot APP_{G2} \cdot \left[ \frac{SORLA_{dimer}}{1 + K_{S2} \cdot APP_{G2}} \right] + \\
& APP_{G2} + 2 \cdot K_{G3} \cdot APP_{G2}^2 \cdot \left\{ 1 + K_{CS2} \cdot \left[ 1 + \frac{K_{C3} \cdot \alpha_2^2}{K_{M\alpha 2d}} \right] + \right. \\
& \left. K_{E2} \cdot K_{CS2} \cdot \left[ 1 + \frac{K_{B3} \cdot \beta_2^2}{K_{M\beta 2d}} \right] \right\} \quad (11)
\end{aligned}$$

Due to the complexity of Equation (11), the computations of  $APP_{G1}$  and  $APP_{G2}$  will not be shown algebraically; but it will be calculated using `fzero()` function in MATLAB. Nevertheless, the algebraic computation for  $\alpha_1$ ,  $\alpha_2$ ,  $\beta_1$  and  $\beta_2$  are shown below. We will show the computation for  $\alpha_1$  and  $\alpha_2$  and the solutions for  $\beta_1$  and  $\beta_2$  will follow similarly.

First, we compute the amounts of  $\alpha_{monomer}$  and  $\alpha_{dimer}$  without SORLA (Equation (5)) given  $APP_{init}$  (Equation (6)),  $\alpha_{init}$  (Equation (8)) and  $\beta_{init}$  (Equation (9)) that are solved previously, i.e.

$$\begin{aligned}
\alpha_{monomer} &= K_{C1} \cdot \alpha_{init} \cdot \left( 1 + \frac{K_{CS1} \cdot K_{G1} \cdot APP_{init}}{K_{M\alpha 1}} \right) \\
\alpha_{dimer} &= K_{C2} \cdot \alpha_{init} + 2 \cdot K_{C3} \cdot (K_{C2} \cdot \alpha_{init})^2 \cdot \left( 1 + \frac{K_{CS2} \cdot K_{G3} \cdot (K_{G2} \cdot APP_{init})^2}{K_{M\alpha 2d}} \right)
\end{aligned}$$

Next, we used the calculated values of  $\alpha_{monomer}$  and  $\alpha_{dimer}$  (shown right above), and substitute them into Equation 10:

$$\begin{aligned}
\alpha_{monomer} &= \alpha_1 + C_{APPCS1\alpha 1}(APP_{G1}, \alpha_1) \\
\alpha_{dimer} &= \alpha_2 + 2 \cdot [\alpha_{2d}(\alpha_2) + C_{APPCS2d\alpha 2d}(APP_{G2}, \alpha_2)]
\end{aligned}$$

which can be rewritten as

$$\begin{aligned}
\alpha_{monomer} &= \alpha_1 \cdot \left( 1 + \frac{K_{CS1} \cdot APP_{G1}}{K_{M\alpha 1}} \right) \\
\alpha_{dimer} &= \alpha_2 + 2 \cdot K_{C3} \cdot \alpha_2^2 \cdot \left( 1 + \frac{K_{CS2} \cdot K_{G3} \cdot APP_{G2}^2}{K_{M\alpha 2d}} \right)
\end{aligned}$$

Lastly, we solved for  $\alpha_1$  and  $\alpha_2$  with respect to the conserved amount of  $\alpha_{monomer}$  and  $\alpha_{dimer}$  (calculated previously):

$$\alpha_1 = \alpha_{monomer} \cdot \left( 1 + \frac{K_{CS1} \cdot APP_{G1}}{K_{M\alpha 1}} \right)^{-1} \quad (12)$$

$$\alpha_2 = \frac{-1 \pm \sqrt{1 + 8 \cdot \alpha_{dimer} \cdot \left[ K_{C3} \cdot \left( 1 + \frac{K_{CS2} \cdot K_{G3} \cdot APP_{G2}^2}{K_{M\alpha 2d}} \right) \right]}}{4 \cdot K_{C3} \cdot \left( 1 + \frac{K_{CS2} \cdot K_{G3} \cdot APP_{G2}^2}{K_{M\alpha 2d}} \right)} \quad (13)$$

Similarly, take

$$\begin{aligned}
\beta_{monomer} &= \beta_1 + C_{APPE1\beta 1}(APP_{G1}, \beta_1) \\
\beta_{dimer} &= \beta_2 + 2 \cdot (\beta_{2d}(\beta_2) + C_{APPE2d\beta 2d}(APP_{G2}, \beta_2))
\end{aligned}$$

such that

$$\beta_1 = \beta_{monomer} \cdot \left(1 + \frac{K_{E1} \cdot K_{CS1} \cdot APP_{G1}}{K_{M\beta1}}\right)^{-1} \quad (14)$$

$$\beta_2 = \frac{-1 \pm \sqrt{1 + 8 \cdot \beta_{dimer} \cdot \left[K_{B3} \cdot \left(1 + \frac{K_{E2} \cdot K_{CS2} \cdot K_{G3} \cdot APP_{G2}^2}{K_{M\beta2d}}\right)\right]}}{4 \cdot K_{B3} \cdot \left(1 + \frac{K_{E2} \cdot K_{CS2} \cdot K_{G3} \cdot APP_{G2}^2}{K_{M\beta2d}}\right)} \quad (15)$$

Note that only the positive solutions are biologically meaningful.

#### 1.4 End products

The representation of the products are summarized below:

For APP-monomer processing,

$$\begin{aligned} sAPP\alpha_1 &= k_6 \cdot \frac{\alpha_1 \cdot APP_{CS1}}{K_{M\alpha1}} \\ sAPP\beta_1 &= k_4 \cdot \frac{\beta_1 \cdot APP_{E1}}{K_{M\beta1}} \end{aligned} \quad (16)$$

while for APP-dimer processing,

$$\begin{aligned} sAPP\alpha_2 &= 2 \cdot k_{61} \cdot \frac{\alpha_{2d} \cdot APP_{CS2d}}{K_{M\alpha2d}} \\ sAPP\beta_2 &= 2 \cdot k_{41} \cdot \frac{\beta_{2d} \cdot APP_{E2d}}{K_{M\beta2d}}. \end{aligned} \quad (17)$$

As a whole, for the compartment model with both APP-monomer and APP-dimer processing,

$$\begin{aligned} sAPP\alpha_{Tot} &= sAPP\alpha_1 + sAPP\alpha_2 \\ sAPP\beta_{Tot} &= sAPP\beta_1 + sAPP\beta_2 \end{aligned} \quad (18)$$

wherein  $APP_{CS1}$ ,  $APP_{E1}$ ,  $APP_{CS2d}$ ,  $APP_{E2d}$ ,  $\alpha_1$ ,  $\beta_1$ ,  $\alpha_{2d}$ , and  $\beta_{2d}$  are functions with respect to  $APP_{init}$ ,  $\alpha_{init}$ , and  $\beta_{init}$  in the absence of SORLA; and they are functions with respect to  $APP_{G1}$ ,  $APP_{G2}$ ,  $\alpha_1$ ,  $\alpha_2$ ,  $\beta_1$ ,  $\beta_2$ ,  $SORLA_{G1}$ , and  $SORLA_{G2}$  in the presence of SORLA. All the computations are done with respect to the given or estimated conserved values of  $APP_{Tot}$ ,  $\alpha_{Tot}$ ,  $\beta_{Tot}$ , and  $SORLA_{Tot}$ .

## 2 List of Additional Tables

Table S1. Description of the variables used in the biochemical network.

| Notation                               | Description                                                                |
|----------------------------------------|----------------------------------------------------------------------------|
| <b><i>TGN compartment</i></b>          |                                                                            |
| $APP_{init}$                           | initial APP                                                                |
| $APP_{G1}$                             | monomeric form of APP in the monomer processing                            |
| $APP_{G2}$                             | monomeric form of APP in the dimer processing                              |
| $APP_{G2d}$                            | dimeric form of APP in the dimer processing                                |
| $SORLAG_1$                             | SORLA in the monomer processing                                            |
| $SORLAG_2$                             | SORLA in the dimer processing                                              |
| $C_{APPG1SORLAG1}$                     | complex of $APP_{G1}$ and $SORLAG_1$ in the monomer processing             |
| $C_{APPG2SORLAG2}$                     | complex of $APP_{G2}$ and $SORLAG_2$ in the dimer processing               |
| <b><i>Cell surface compartment</i></b> |                                                                            |
| $APP_{CS1}$                            | monomeric form of APP in the monomer processing                            |
| $APP_{CS2d}$                           | dimeric form of APP in the dimer processing                                |
| $\alpha_{init}$                        | initial $\alpha$ -secretase                                                |
| $\alpha_1$                             | monomeric form of $\alpha$ -secretase in the monomer processing            |
| $\alpha_2$                             | monomeric form of $\alpha$ -secretase in the dimer processing              |
| $\alpha_{2d}$                          | dimeric form of $\alpha$ -secretase in the dimer processing                |
| $C_{APPCS1\alpha_1}$                   | complex of $APP_{CS1}$ and $\alpha_1$ , formed within monomer processing   |
| $C_{APPCS2d\alpha_2d}$                 | complex of $APP_{CS2d}$ and $\alpha_{2d}$ , formed within dimer processing |
| $C83_1$                                | fragment C83, resulting from monomer processing                            |
| $C83_{2d}$                             | fragment C83-dimer, resulting from dimer processing                        |
| $sAPP\alpha_1$                         | soluble APP $\alpha$ , resulting from monomer processing                   |
| $sAPP\alpha_2$                         | soluble APP $\alpha$ , resulting from dimer processing                     |
| <b><i>Endosome compartment</i></b>     |                                                                            |
| $APP_{E1}$                             | monomeric form of APP in the monomer processing                            |
| $APP_{E2d}$                            | dimeric form of APP in the dimer processing                                |
| $\beta_{init}$                         | initial $\beta$ -secretase                                                 |
| $\beta_1$                              | monomeric form of $\beta$ -secretase in the monomer processing             |
| $\beta_2$                              | monomeric form of $\beta$ -secretase in the dimer processing               |
| $\beta_{2d}$                           | dimeric form of $\beta$ -secretase in the dimer processing                 |
| $C_{APPE1\beta_1}$                     | complex of $APP_{E1}$ and $\beta_1$ , formed within monomer processing     |
| $C_{APPE2d\beta_2d}$                   | complex of $APP_{E2d}$ and $\beta_{2d}$ , formed within dimer processing   |
| $C99_1$                                | fragment C99 in monomer processing                                         |
| $C99_{2d}$                             | fragment C99-dimer in dimer processing                                     |
| $sAPP\beta_1$                          | soluble APP $\beta$ , resulting from monomer processing                    |
| $sAPP\beta_2$                          | soluble APP $\beta$ , resulting from dimer processing                      |

Table S2. Description of the variables and parameters used in the mathematical model.

**A. List of variables:**

| Notation                  | Unit | Description                                                                                |
|---------------------------|------|--------------------------------------------------------------------------------------------|
| $APP_{init}$              | fmol | free initial APP-monomer in TGN                                                            |
| $APP_{G1}$                | fmol | free APP-monomer in monomer processing of TGN                                              |
| $APP_{G2}$                | fmol | free APP-monomer in dimer processing of TGN                                                |
| $APP_{G2d}$               | fmol | free APP-dimer in dimer processing of TGN                                                  |
| $APP_{CS1}$               | fmol | free APP-monomer in monomer processing of cell surface                                     |
| $APP_{CS2d}$              | fmol | free APP-dimer in dimer processing of cell surface                                         |
| $APP_{E1}$                | fmol | free APP-monomer in monomer processing of endosome                                         |
| $APP_{E2d}$               | fmol | free APP-dimer in dimer processing of endosome                                             |
| $\alpha_{init}$           | fmol | free initial $\alpha$ -secretase within cell surface                                       |
| $\alpha_1$                | fmol | free $\alpha$ -secretase-monomer in monomer processing within cell surface                 |
| $\alpha_2$                | fmol | free $\alpha$ -secretase-monomer in dimer processing within cell surface                   |
| $\alpha_{2d}$             | fmol | free $\alpha$ -secretase-dimer in dimer processing within cell surface                     |
| $\beta_{init}$            | fmol | free initial $\beta$ -secretase within endosome                                            |
| $\beta_1$                 | fmol | free $\beta$ -secretase-monomer in monomer processing within endosome                      |
| $\beta_2$                 | fmol | free $\beta$ -secretase-monomer in dimer processing within endosome                        |
| $\beta_{2d}$              | fmol | free $\beta$ -secretase-dimer in dimer processing within endosome                          |
| $C_{APP_{CS1}\alpha_1}$   | fmol | complex of $APP_{CS1}$ and $\alpha_1$ , formed within monomer processing of cell surface   |
| $C_{APPE1\beta_1}$        | fmol | complex of $APP_{E1}$ and $\beta_1$ , formed within monomer processing of endosome         |
| $C_{APP_{CS2d}\alpha_2d}$ | fmol | complex of $APP_{CS2d}$ and $\alpha_{2d}$ , formed within dimer processing of cell surface |
| $C_{APPE2d\beta_2d}$      | fmol | complex of $APP_{E2d}$ and $\beta_{2d}$ , formed within dimer processing of endosome       |
| $sAPP_{\alpha_1}$         | fmol | soluble APP $\alpha$ resulting from monomer processing of cell surface                     |
| $sAPP_{\beta_1}$          | fmol | soluble APP $\beta$ resulting from monomer processing of endosome                          |
| $sAPP_{\alpha_2}$         | fmol | soluble APP $\alpha$ resulting from dimer processing of cell surface                       |
| $sAPP_{\beta_2}$          | fmol | soluble APP $\beta$ resulting from dimer processing of endosome                            |
| $SORLAG_1$                | fmol | free SORLA in the monomer processing of TGN                                                |
| $SORLAG_2$                | fmol | free SORLA in the dimer processing of TGN                                                  |
| $C_{APP_{G1}SORLAG_1}$    | fmol | complex of $APP_{G1}$ and $SORLAG_1$ in the monomer processing of TGN                      |
| $C_{APP_{G2}SORLAG_2}$    | fmol | complex of $APP_{G2}$ and $SORLAG_2$ in the dimer processing of TGN                        |
| $APP_{monomer}$           | fmol | total APP conserved in the monomer processing                                              |
| $APP_{dimer}$             | fmol | total APP conserved in the dimer processing                                                |
| $APP_{Tot}$               | fmol | total APP conserved in the whole system                                                    |
| $SORLA_{monomer}$         | fmol | total SORLA conserved in the monomer processing                                            |
| $SORLA_{dimer}$           | fmol | total SORLA conserved in the dimer processing                                              |
| $SORLA_{Tot}$             | fmol | total SORLA conserved in the whole system                                                  |
| $\alpha_{monomer}$        | fmol | total $\alpha$ -secretase conserved in the monomer processing                              |
| $\alpha_{dimer}$          | fmol | total $\alpha$ -secretase conserved in the dimer processing                                |
| $\alpha_{Tot}$            | fmol | total $\alpha$ -secretase conserved in the whole system                                    |
| $\beta_{monomer}$         | fmol | total $\beta$ -secretase conserved in the monomer processing                               |
| $\beta_{dimer}$           | fmol | total $\beta$ -secretase conserved in the dimer processing                                 |
| $\beta_{Tot}$             | fmol | total $\beta$ -secretase conserved in the whole system                                     |
| $sAPP_{\alpha_{Tot}}$     | fmol | total soluble APP $\alpha$                                                                 |
| $sAPP_{\beta_{Tot}}$      | fmol | total soluble APP $\beta$                                                                  |

Table S2. Description of the variables and parameters used in the mathematical model.

**B. List of parameters:**

| Notation        | Unit                                   | Description                                                                                 |
|-----------------|----------------------------------------|---------------------------------------------------------------------------------------------|
| $K_{G1}$        |                                        | equilibrium constant of $APP_{init}$ and $APP_{G1}$                                         |
| $K_{G2}$        |                                        | equilibrium constant of $APP_{init}$ and $APP_{G2}$                                         |
| $K_{CS1}$       |                                        | equilibrium constant of $APP_{G1}$ and $APP_{CS1}$                                          |
| $K_{CS2}$       |                                        | equilibrium constant of $APP_{G2d}$ and $APP_{CS2d}$                                        |
| $K_{E1}$        |                                        | equilibrium constant of $APP_{CS1}$ and $APP_{E1}$                                          |
| $K_{E2}$        |                                        | equilibrium constant of $APP_{CS2d}$ and $APP_{E2d}$                                        |
| $K_{C1}$        |                                        | equilibrium constant of $\alpha_{init}$ and $\alpha_1$                                      |
| $K_{C2}$        |                                        | equilibrium constant of $\alpha_{init}$ and $\alpha_2$                                      |
| $K_{B1}$        |                                        | equilibrium constant of $\beta_{init}$ and $\beta_1$                                        |
| $K_{B2}$        |                                        | equilibrium constant of $\beta_{init}$ and $\beta_2$                                        |
| $K_{G3}$        | $\text{fmol}^{-1}$                     | association constant of APP dimerization                                                    |
| $K_{B3}$        | $\text{fmol}^{-1}$                     | association constant of $\beta$ -secretase dimerization                                     |
| $K_{C3}$        | $\text{fmol}^{-1}$                     | association constant of $\alpha$ -secretase dimerization                                    |
| $K_{S1}$        | $\text{fmol}^{-1}$                     | association constant of $APP_{G1}$ and $SORLA_{G1}$                                         |
| $K_{S2}$        | $\text{fmol}^{-1}$                     | association constant of $APP_{G2}$ and $SORLA_{G2}$                                         |
| $k_i$           | $\text{fmol}^{-1} \cdot \text{h}^{-1}$ | binding rate constant (where $i = 1, 3, 5, 31, 51$ )                                        |
| $k_j$           | $\text{h}^{-1}$                        | dissociation rate constant (where $j = -1, -3, -5, -31, -51, -g3, -b3, -c3, 4, 6, 41, 61$ ) |
| $k_h$           | $\text{fmol}^{-1} \cdot \text{h}^{-1}$ | dimerization rate constant (where $h = g3, b3, c3$ )                                        |
| $k_q$           | $\text{h}^{-1}$                        | inflow rate constant (where $q = g1, g2, cs1, cs2, e1, e2, c1, c2, b1, b2$ )                |
| $k_t$           | $\text{h}^{-1}$                        | outflow rate constant (where $q = -g1, -g2, -cs1, -cs2, -e1, -e2, -c1, -c2, -b1, -b2$ )     |
| $k_r$           | $\text{fmol} \cdot \text{h}^{-1}$      | initial rate (where $r = g0$ )                                                              |
| $K_{M\alpha1}$  | $\text{fmol}$                          | defined by $(k_6 + k_{-5})/k_5$                                                             |
| $K_{M\beta1}$   | $\text{fmol}$                          | defined by $(k_4 + k_{-3})/k_3$                                                             |
| $K_{M\alpha2d}$ | $\text{fmol}$                          | defined by $(k_{61} + k_{-51})/k_{51}$                                                      |
| $K_{M\beta2d}$  | $\text{fmol}$                          | defined by $(k_{41} + k_{-31})/k_{31}$                                                      |

Table S3. Steps in computer simulations.

- 
- I Sort experimental data according to the total amount of APP values
  - II For simulation purpose, the unit of measurements is unified into fmol (i.e. the values of  $APP_{Tot}$  is converted from Molar to fmol, wherein the unit of measurement for  $sAPP\alpha$  and  $sAPP\beta$  remains as fmol)
  - III The initial values of the parameters are randomly assigned using the `rand()` function.
  - IV The initial values described in Step III are used by the `lsqnonlin()` function to estimate the parameter values of the mathematical model, whereby the following tasks are performed:
    - i Given the total amount of APP values from the experimental data without SORLA, the `fzero()` function is used to solve for  $APP_{init}$
    - ii Use the  $APP_{init}$  that is solved in (i) to solve for  $\alpha_{init}$  and  $\beta_{init}$  while simultaneously estimating the values for  $\alpha_{Tot}$  and  $\beta_{Tot}$ .
    - iii Since, the total amount of APP values measured between the experimental data without SORLA and the experimental data with SORLA are different. Thus, it is necessary to compute for the corresponding free APP in the both cases, i.e. with and without SORLA.
    - iv Use the values of  $APP_{init}$ ,  $\alpha_{init}$ , and  $\beta_{init}$  that are calculated in (i) and (ii) to solve for the conserved amount of APP,  $\alpha$ -, and  $\beta$ -secretase in monomer and in dimer processing without SORLA, i.e.  $APP_{monomer}$ ,  $APP_{dimer}$ ,  $\alpha_{monomer}$ ,  $\alpha_{dimer}$ ,  $\beta_{monomer}$ , and  $\beta_{dimer}$ .
    - v Use  $APP_{monomer}$ ,  $APP_{dimer}$ ,  $\alpha_{monomer}$ ,  $\alpha_{dimer}$ ,  $\beta_{monomer}$ , and  $\beta_{dimer}$  that are solved in (iv) to recalculate for the values of  $APP_{G1}$ ,  $APP_{G2}$ ,  $\alpha_1$ ,  $\alpha_2$ ,  $\beta_1$ , and  $\beta_2$ , which are influenced by SORLA.
    - vi Then, apply APP,  $\alpha$ -, and  $\beta$ -secretase that are calculated in (i) and (ii) into the production rate equations of  $sAPP\alpha$  and  $sAPP\beta$  without SORLA, and those in (v) into that of with SORLA.
    - vii Lastly, the sum of weighted squares of differences between the experimental data and results in (vi) are being minimized, i.e. the predicted and observed total amount of
      - 1  $sAPP\alpha$  without SORLA
      - 2  $sAPP\beta$  without SORLA
      - 3  $sAPP\alpha$  with SORLA
      - 4  $sAPP\beta$  with SORLA
      - 5 APP with SORLA. (This step is necessary because the free APP in the case of with SORLA are computed indirectly)
-

Table S4. Estimated parameter values for Figure 2: Residual=  $2.15 \times 10^1$ .

| parameter          | (units)               | values                | parameter        | (units)               | values                |
|--------------------|-----------------------|-----------------------|------------------|-----------------------|-----------------------|
| $\alpha_{Tot}$     | (fmol)                | $5.52 \times 10^3$    | $\beta_{Tot}$    | (fmol)                | $1.31 \times 10^1$    |
| $K_{B3}$           | (fmol <sup>-1</sup> ) | $2.55 \times 10^{-2}$ | $K_{C3}$         | (fmol <sup>-1</sup> ) | $1.52 \times 10^{-5}$ |
| $K_{G3}$           | (fmol <sup>-1</sup> ) | $4.45 \times 10^{11}$ |                  |                       |                       |
| Monomer processing |                       |                       | Dimer processing |                       |                       |
| $K_{G1}$           |                       | $1.19 \times 10^{-9}$ | $K_{G2}$         |                       | $2.00 \times 10^{-7}$ |
| $K_{CS1}$          |                       | $2.01 \times 10^8$    | $K_{CS2}$        |                       | $2.38 \times 10^0$    |
| $K_{E1}$           |                       | $7.33 \times 10^{-2}$ | $K_{E2}$         |                       | $2.41 \times 10^0$    |
| $K_{C1}$           |                       | $1.80 \times 10^1$    | $K_{C2}$         |                       | $1.64 \times 10^3$    |
| $K_{B1}$           |                       | $2.37 \times 10^1$    | $K_{B2}$         |                       | $1.90 \times 10^2$    |
| $SORLA_{monomer}$  | (fmol)                | $1.23 \times 10^1$    | $SORLA_{dimer}$  | (fmol)                | $2.43 \times 10^5$    |
| $K_{S1}$           | (fmol <sup>-1</sup> ) | $3.16 \times 10^{-9}$ | $K_{S2}$         | (fmol <sup>-1</sup> ) | $8.35 \times 10^3$    |
| $k_6$              | (h <sup>-1</sup> )    | $7.29 \times 10^{-4}$ | $k_{61}$         | (h <sup>-1</sup> )    | $1.77 \times 10^1$    |
| $K_{M\alpha 1}$    | (fmol)                | $1.37 \times 10^{-2}$ | $K_{M\alpha 2d}$ | (fmol)                | $5.91 \times 10^3$    |
| $k_4$              | (h <sup>-1</sup> )    | $5.25 \times 10^2$    | $k_{41}$         | (h <sup>-1</sup> )    | $6.59 \times 10^{-1}$ |
| $K_{M\beta 1}$     | (fmol)                | $2.23 \times 10^2$    | $K_{M\beta 2d}$  | (fmol)                | $6.50 \times 10^1$    |

### 3 List of Additional Figures

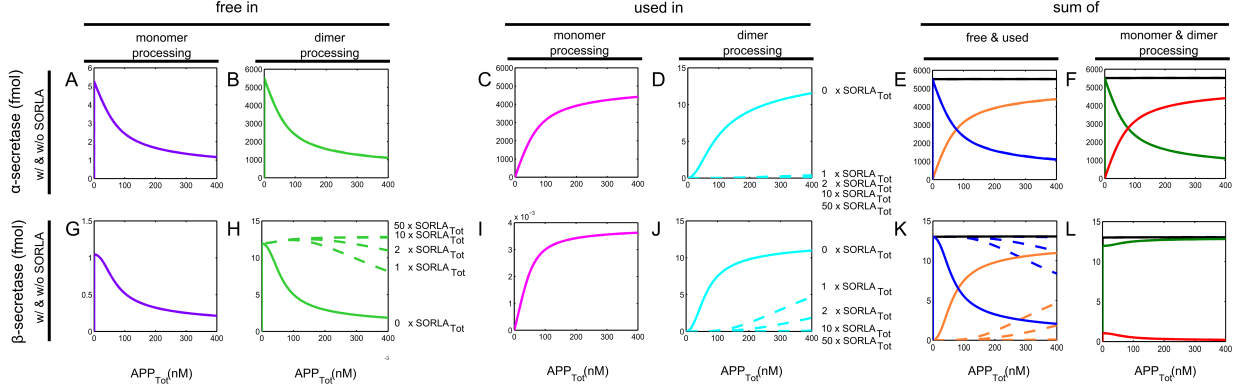

Figure S1: **Concentration values of the secretases with higher  $SORLA_{Tot}$  values.** Simulations of the influence of intermediate levels of SORLA on APP processing on the amount of  $\alpha$ -secretase (**A-F**) and  $\beta$ -secretase (**G-L**) concentration. The term “used” refers to the complex formation of the secretases and APP, while the term “free” refers to the secretases that are not bound in a complex. There are five intermediate levels of SORLA, namely, 0% (solid line), 100%, 200%, 1000%, and 5000% (dashed line) of  $SORLA_{Tot}$  (where  $SORLA_{Tot} = 2.43 \times 10^5$  fmol). When there is only solid line in a plot, it is because solid and dashed lines are superimposed. Starting from the first column, there shows the amount of  $\alpha$ - (**A**) and  $\beta$ -secretase (**G**) that is free in monomer processing. In the second column, it shows the amount of  $\alpha$ - (**B**) and  $\beta$ -secretase (**H**) that is free in dimer processing. The amount of  $\alpha$ - (**C**) and  $\beta$ -secretase (**I**) used in monomer processing are shown in the third column, whereas those used in dimer processing (**D**, **J**) are shown in the fourth column. In the fifth column, there shows the total amount of  $\alpha$ - (**E**) and  $\beta$ -secretase (**K**) that is free (blue line) and used (orange line) in the system. Lastly, there is the total amount of  $\alpha$ - (**F**) and  $\beta$ -secretase (**L**) in monomer (blue line) and in dimer (orange line) processing of the system. The black lines in (**E**, **F**) and in (**K**, **L**) are the estimated total amount of  $\alpha$ - and  $\beta$ -secretase, respectively. In particular, the black line in (**E**, **K**) represents the sum of the secretase concentration depicted by the blue and orange lines, while the one in (**F**, **L**) indicates the sum of the secretase concentration depicted by the red and green lines. Notice that the solid and dashed lines for both blue and orange colors deviate in (**K**). This, however, is not the case in (**E**).
